# Supplementary material
Source: PubMed Central journal article supplement (PMC7029103)
Supplement: supp_RA119.011147_155951_2_supp_454797_q3r2fg.pdf [file supp_RA119.011147_155951_2_supp_454797_q3r2fg.pdf]

## SUPPLEMENTAL INFORMATION

### The phosphatidic-acid pathway enzyme PlsX plays both catalytic and channeling roles in bacterial phospholipid synthesis

Diego E. Sastre<sup>1,5</sup>, André A. Pulschen<sup>1</sup>, Luis G. M. Basso<sup>2</sup>, Jhonathan S. Benites Pariente<sup>1</sup>, Caterina G. C. Marques Netto<sup>3</sup>, Federico Machinandiarena<sup>4</sup>, Daniela Albanesi<sup>4</sup>, Marcos V.A.S. Navarro<sup>5</sup>, Diego de Mendoza<sup>4\*</sup>, Frederico J. Gueiros-Filho<sup>1\*</sup>

<sup>1</sup>Instituto de Química, Departamento de Bioquímica, Universidade de São Paulo, São Paulo, Brazil.

<sup>2</sup> Departamento de Física, Faculdade de Filosofia Ciências e Letras de Ribeirão Preto, Universidade de São Paulo, Ribeirão Preto, Brazil

<sup>3</sup>Departamento de Química, Universidade Federal de São Carlos (UFSCar), São Carlos, Brazil.

<sup>4</sup>Instituto de Biología Molecular y Celular de Rosario (IBR), and Departamento de Microbiología, Facultad de Ciencias Bioquímicas y Farmacéuticas, Universidad Nacional de Rosario, Rosario, Santa Fe, Argentina.

<sup>5</sup>Instituto de Física de São Carlos, Departamento de Biofísica Molecular, Universidade de São Paulo, São Carlos, Brazil.

Running title: *Catalytic and channeling roles of PlsX*

**\*To whom correspondence should be addressed:** Frederico J. Gueiros-Filho, Instituto de Química, IQ- USP, Av. Prof. Lineu Prestes 748, CEP05508000, São Paulo, SP, Brazil. Phone: (+55-11-3091-9101), E- mail: [fgueiros@iq.usp.br](mailto:fgueiros@iq.usp.br); Diego de Mendoza, Instituto de Biología Molecular y Celular de Rosario, IBR- Conicet, Esmeralda and Ocampo, S2002LRK Rosario, Santa Fe, Argentina. Phone: (+54-341-4237070. Ext: 621). E-mail: [demendoza@ibr-conicet.gov.ar](mailto:demendoza@ibr-conicet.gov.ar)

**Keywords:** glycerophospholipid, Gram-positive bacteria, membrane biogenesis, acyltransferase, lipid binding protein, PlsX, acyl-phosphate, substrate channeling, protein-membrane interaction, phosphatidic acid

## SUPPLEMENTARY TABLES

**Table S1**

**Table S1. List of strains and plasmids used in this study**

| Strains/<br>Plasmids | Relevant features or genotype                                                                                                                                                                          | Construction, source or reference     |
|----------------------|--------------------------------------------------------------------------------------------------------------------------------------------------------------------------------------------------------|---------------------------------------|
| <i>B. subtilis</i>   |                                                                                                                                                                                                        |                                       |
| PY79                 | Prototroph SPβ                                                                                                                                                                                         | Laboratory stock                      |
| DS09                 | PY79 <i>amyE</i> ::cat (PxyI-gfp-plsX)                                                                                                                                                                 | pDS1 integration into strain PY79     |
| DS28                 | PY79 (cat PxyI-plsX), (erm Pspac-fabD)                                                                                                                                                                 | derived from LP39 (1)                 |
| DS69                 | PY79 (cat PxyI-plsX), (erm Pspac-fabD); <i>amyE</i> ::spc (Phy-spank-gfp-plsX)                                                                                                                         | pDS2 integration into strain DS28 (2) |
| DS34                 | DS28 <i>amyE</i> ::spc (Phy-spank-gfp-plsX AH2(+2))                                                                                                                                                    | This study                            |
| DS48                 | DS28 <i>amyE</i> ::spc (Phy-spank-gfp-plsX AH (+3))                                                                                                                                                    | This study                            |
| DS58                 | DS28 <i>amyE</i> ::spc (Phy-spank-gfp-plsX L235E)                                                                                                                                                      | This study                            |
| DS160                | DS28 <i>amyE</i> ::spc (Phy-spank-gfp-plsX L254E)                                                                                                                                                      | This study                            |
| DS161                | DS28 <i>amyE</i> ::spc (Phy-spank-gfp-plsX K271A)                                                                                                                                                      | This study                            |
| DS170                | DS28 <i>amyE</i> ::spc (Phy-spank-gfp-plsX-hbsu)                                                                                                                                                       | This study                            |
| DS171                | DS28 <i>amyE</i> ::spc (Phy-spank-gfp-plsX L254E-hbsu)                                                                                                                                                 | This study                            |
| <i>E. coli</i>       |                                                                                                                                                                                                        |                                       |
| DH5α                 | F <sup>-</sup> , φ80lacZΔM15, Δ (lacZYAargF) U196, recA1, endA1, hsdR17, (rK <sup>-</sup> , mK <sup>+</sup> ), phoA, supE44, λ <sup>-</sup> , thi-1, gyrA96, relA1                                     | Laboratory stock                      |
| BL21 (DE3)           | F <sup>-</sup> <i>ompT gal dcm lon hsdS<sub>B</sub>(r<sub>B</sub><sup>-</sup>m<sub>B</sub><sup>-</sup>) λ(DE3 [lacI lacUV5-T7p07 ind1 sam7 nin5]) [malB<sup>+</sup>]<sub>K-12</sub>(λ<sup>S</sup>)</i> | Laboratory stock                      |
| DS52                 | <i>E. coli</i> BL21 pET-24b-plsX wt                                                                                                                                                                    | This study                            |
| DS85                 | <i>E. coli</i> BL21 pET-24b-plsX AH2(+2)                                                                                                                                                               | This study                            |
| DS87                 | <i>E. coli</i> BL21 pET-24b-plsX AH2(+3)                                                                                                                                                               | This study                            |
| DS88                 | <i>E. coli</i> BL21 pET-24b-plsX L235E                                                                                                                                                                 | This study                            |
| DS125                | <i>E. coli</i> BL21 pET-24b-plsX L254E                                                                                                                                                                 | This study                            |
| DS126                | <i>E. coli</i> BL21 pET-24b-plsX Y276E                                                                                                                                                                 | This study                            |
| DS130                | <i>E. coli</i> BL21 pET-24b-plsX V262E                                                                                                                                                                 | This study                            |
| DS131                | <i>E. coli</i> BL21 pET-24b-plsX K271A                                                                                                                                                                 | This study                            |
| DS139                | <i>E. coli</i> BL21 pET-24b-plsX L258E-A259E                                                                                                                                                           | This study                            |
| DS140                | <i>E. coli</i> BL21 pET-24b-plsX K264A                                                                                                                                                                 | This study                            |
| DS128                | <i>E. coli</i> BL21 pREP4 pQE30-tev-acp                                                                                                                                                                | Laboratory stock                      |
| Plasmids             |                                                                                                                                                                                                        |                                       |
| pDR111               | <i>bla amyE3' spc Phy-spank lacI amyE5'</i>                                                                                                                                                            | Laboratory stock                      |
| pDS2                 | <i>bla amyE3' spc Phy-spank-gfp-plsX amyE5'</i>                                                                                                                                                        | derived of pDR111 (2)                 |
| pET24b(+)            | 5.3-kb plasmid allowing C-terminal protein fusion to 6X-His; Kan <sup>r</sup>                                                                                                                          | Novagen                               |
| pDS2_1               | <i>bla amyE3' spc Phy-spank-gfp-plsX AH2(+2) amyE5'</i>                                                                                                                                                | This study                            |
| pDS2_2               | <i>bla amyE3' spc Phy-spank-gfp-plsX AH (+3) amyE5'</i>                                                                                                                                                | This study                            |
| pDS2_3               | <i>bla amyE3' spc Phy-spank-gfp-plsX L235E amyE5'</i>                                                                                                                                                  | This study                            |
| pDS2_4               | <i>bla amyE3' spc Phy-spank-gfp-plsX L254E amyE5'</i>                                                                                                                                                  | This study                            |
| pDS2_5               | <i>bla amyE3' spc Phy-spank-gfp-plsX K271A amyE5'</i>                                                                                                                                                  | This study                            |
| pDS2_6               | <i>bla amyE3' spc Phy-spank-gfp-plsX-hbsu amyE5'</i>                                                                                                                                                   | This study                            |
| pDS2_7               | <i>bla amyE3' spc Phy-spank-gfp-plsX L254E-hbsu amyE5'</i>                                                                                                                                             | This study                            |
| pDS_a                | pET-24b-plsX wt                                                                                                                                                                                        | This study                            |
| pDS_b                | pET-24b-plsX AH2(+2)                                                                                                                                                                                   | This study                            |
| pDS_c                | pET-24b-plsX AH2(+3)                                                                                                                                                                                   | This study                            |
| pDS_d                | pET-24b-plsX L235E                                                                                                                                                                                     | This study                            |
| pDS_e                | pET-24b-plsX L254E                                                                                                                                                                                     | This study                            |
| pDS_f                | pET-24b-plsX Y276E                                                                                                                                                                                     | This study                            |
| pDS_g                | pET-24b-plsX V262E                                                                                                                                                                                     | This study                            |
| pDS_h                | pET-24b-plsX K271A                                                                                                                                                                                     | This study                            |
| pDS_i                | pET-24b-plsX L258E-A259E                                                                                                                                                                               | This study                            |
| pDS_j                | pET-24b-plsX K264A                                                                                                                                                                                     | This study                            |
| pREP4                | pQE30-tev-acp                                                                                                                                                                                          | Laboratory stock                      |

**Table S2****Table S2. List of oligonucleotide primers used in this study**

| Primer name        | sequence (5'-3')                                  |
|--------------------|---------------------------------------------------|
| NheI-rbs-GFP F     | CCACGCTAGCAAAGGTGGTGAATCTGGCATGAGTAAAGGAGAAGAAC   |
| SphI-PlsX stop R   | CGCCGCATGCCTACTCATCTGTTTTTCTTC                    |
| SphI-HBsu stop R   | CCTATGCATGCTTATTTCCGGCAACTGCGTC                   |
| HBsu-linker-PlsX R | GTTCATGCGTCCGACTGCTTCCTCCTCATCTGTTTTTCTTCTTTCAC   |
| PlsX-linker-HBsu F | GAGGAGGAAGCAGTCGGACGCATGAACAAAACAGAACTTATCAATGCGG |
| NdeI-PlsX F        | GCACATATGAGAATAGCTGTAGATG                         |
| XhoI-stop PlsX R   | GTAGGATCCCTCGAGGTACTCATCTGTTTTTTC                 |
| PlsX_AH2(+2) F     | CTCTGCGTTGTCAATTGCGGAGTTTAAAATGATGAGAG            |
| PlsX_AH2(+2) R     | CTCTCATCATTTTAAACTCCGCAATTGACAACGCAGAG            |
| PlsX_AH2(+3) F     | GCTCTGCGTTGTCAATTGAGGAGCTCTTTAAAATGATGAGAG        |
| PlsX_AH2(+3) R     | CTCTCATCATTTTAAAGAGCTCCTCAATTGACAACGCAGAGC        |
| PlsX_L235E F       | GTTACACTCAAACGAGGAAGGCTCTGCGTTG                   |
| PlsX_L235E R       | CAACGCAGAGCCTTCCTCCGTTTTGAGTGTAAC                 |
| PlsX_L254E F       | CGTAATGACGTCTACTGAGACATCCAAGCTTGCAAG              |
| PlsX_L254E R       | CTGCAAGCTTGATGTCTCAGTAGACGTCATTACG                |
| PlsX_L258E-A259E F | GTCTACTTTGACATCCAAGGAGGAAGCAGCTGTGCTGAAAC         |
| PlsX_L258E-A259E R | GTTTCAGCACAGCTGCTTCCTCCTGGATGTCAAAGTAGAC          |
| PlsX_V262E F       | CAAGCTTGCAGCAGCTGAGCTGAAACCAAATTG                 |
| PlsX_V262E R       | CAATTTTGGTTTCAGCTCAGCTGCTGCAAGCTTG                |
| PlsX_K264A F       | GCAGCAGCTGTGCTGGCACCAAAATTGAAAG                   |
| PlsX_K264A R       | CTTTCAATTTTGGTGCCAGCACAGCTGCTGC                   |
| PlsX_K271A F       | CAAAATTGAAAGAAATGGCAATGAAAATGGAGTATTC             |
| PlsX_K271A R       | GAATACTCCATTTTCATTGCCATTCTTTCAATTTTG              |
| PlsX_Y276E F       | TGAAAATGGAGGATTGCAATTATGGCG                       |
| PlsX_Y276E R       | CGCCATAATTGCAATCCTCCATTTTCA                       |

## SUPPLEMENTARY FIGURES

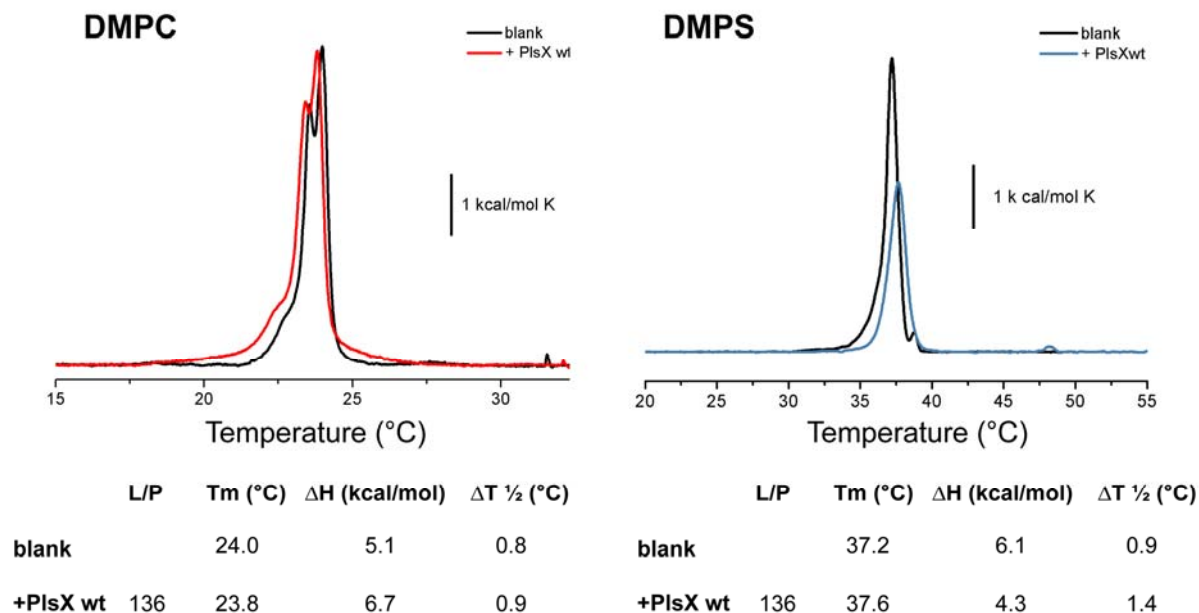

**Figure S1. Interaction of PlsX with DMPC and DMPS LUVs.** Effect of PlsX wt on the thermotropic behavior of lipid bilayer membranes probed by DSC. Excess heat capacity of DMPC (left panel) and DMPS (right panel) in the absence (black) and in the presence of PlsX at lipid-to-protein (L/P) molar ratio of 136:1. Lipid concentration was 800 μM in all cases. The phase transition temperature,  $T_m$ , the calorimetric enthalpy change,  $\Delta H$ , and the linewidth at half height,  $\Delta T_{1/2}$ , were obtained from analysis of the thermograms with MicroCal Origin software. Data shown are representative of two independent experiments.

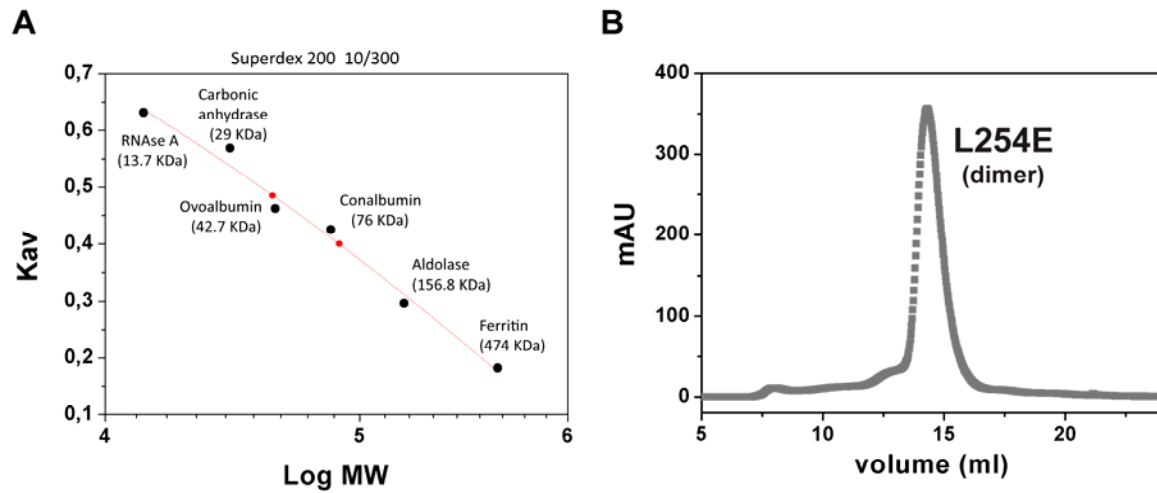

**Figure S2. Calibration of Superdex S-200 10/300 and gel filtration of PlsX<sup>L254E</sup> mutant.**  
 A. The red points are indicating the peaks of PlsX dimer (Kav=0.398) and PlsX monomer (Kav=0.485). B. Purified PlsX L254E mutant was a soluble dimeric protein in a S-200 gel filtration chromatography. Data shown are representative of two independent experiments.

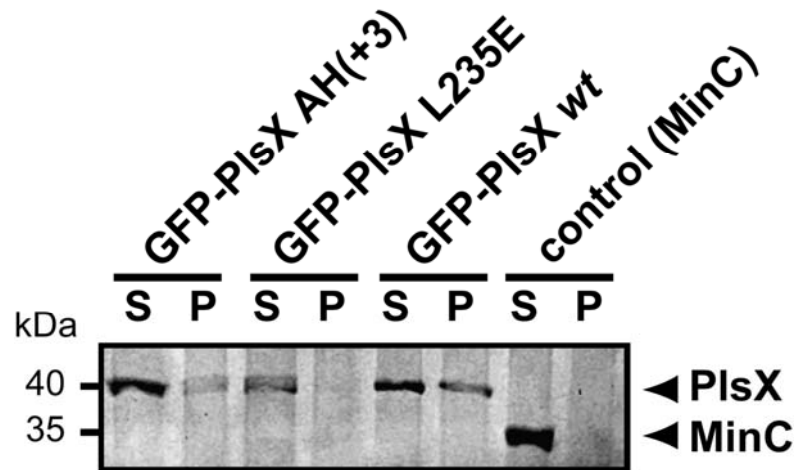

**Figure S3. Cosedimentation assay showing the interaction of PlsX *wt* with liposomes.** No interaction can be seen in the case of L235E mutant and MinC (negative control). S: supernatant of ultracentrifugation. P: pellet of ultracentrifugation. L: ladder. Data shown are representative of two independent experiments.

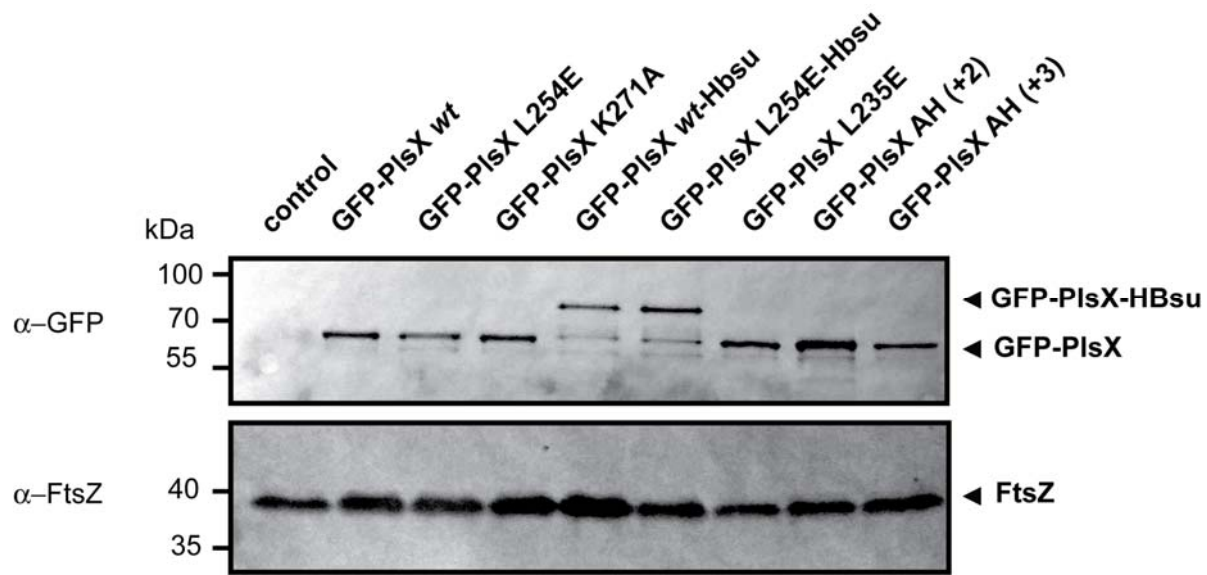

**Figure S4. Western blotting assay.** Cell lysates of *B. subtilis* DS28 (control) containing different relevant mutations of GFP-PlsX fusions were subjected to 10% SDS-polyacrylamide gel electrophoresis. GFP- PlsX was detected using the polyclonal rabbit anti-GFP antibody (upper panel). The cellular amount of FtsZ, used as a normalization control, was analyzed with anti-FtsZ antibody (lower panel). Data shown are representative of two independent experiments.

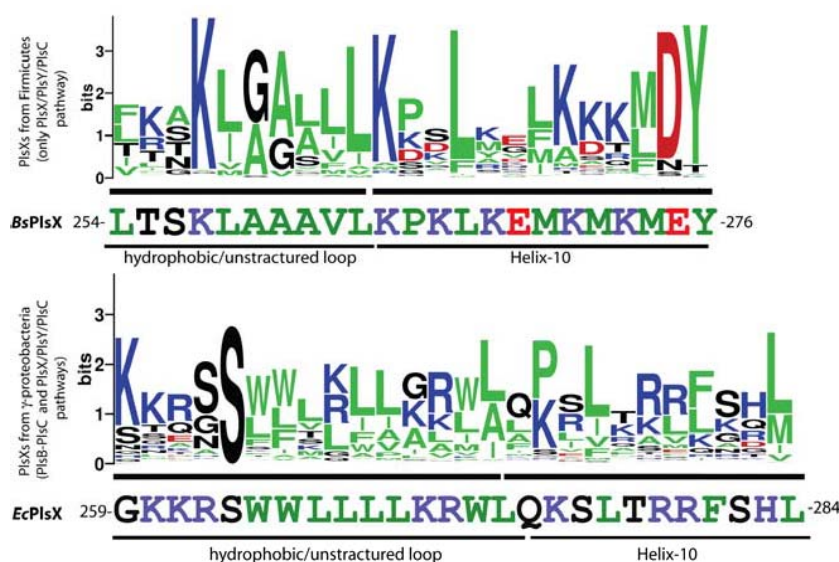

**Figure S5. Sequence logo of aminoacid residues of hydrophobic loop and helix-10 from different PlsXs proteins.** 150 sequences from Firmicutes and 150 from  $\gamma$ -proteobacteria were obtained from NCBI database ([www.ncbi.nlm.nih.gov/protein](http://www.ncbi.nlm.nih.gov/protein)). Multiple sequence alignment was performed using T-Coffee (3) and the Logo was obtained using WebLogo online server (4).

## References

1. Paoletti, L., Lu, Y. J., Schujman, G. E., de Mendoza, D., and Rock, C. O. (2007) Coupling of fatty acid and phospholipid synthesis in *Bacillus subtilis*. *J. Bacteriol.* **189**, 5816-5824.
2. Sastre, D. E., Bisson-Filho, A., de Mendoza, D., and Gueiros-Filho, F. J. (2016) Revisiting the cell biology of the acyl-ACP:phosphate transacylase PlsX suggests that the phospholipid synthesis and cell division machineries are not coupled in *Bacillus subtilis*. *Mol. Microb.* **100**, 621-6344.
3. Notredame, C., Higgins, D. G., and Heringa, J. (2000) T-Coffee: A novel method for fast and accurate multiple sequence alignment. *J. Mol. Biol.* **302**, 205-217.
4. Crooks, G. E., Hon, G., Chandonia, J. M., and Brenner, S. E. (2004) WebLogo: a sequence logo generator. *Genome Res.* **14**, 1188-1190.
